# Supplementary material
Source: publisher figshare collection journal article supplement (https://gsapubs.figshare.com/ndownloader/files/23303402)
Supplement: Supplementary file 1 [file 23303402]

The  $M_w$  8.3 Illapel earthquake (Chile): Preseismic and postseismic activity associated with hydrated slab structures

Poli et al.

1    **Supporting Information**

2    **Identification of repeating earthquakes**

3    We study the presence of repeating earthquakes with  $M_w > 4$  in the CSN catalog using data  
4    from 2011 when good station coverage is present in the region (Fig. S3). To individuate a  
5    repeater we calculate the cross correlation of vertical component seismograms in a frequency  
6    band from  $0.5F_c$  to  $2F_c$  (Uchida and Matsuzawa, 2013), where the corner frequency ( $F_c$ ) is  
7    calculated for 3MPa stress drop (Sato and Hirasawa, 1973). We used signals from 2 sec before  
8    P waves up to 15s after the arrival of S waves. A repeater is defined when the correlation  
9    coefficient for 2 or more stations exceed 0.95 (Fig. S5).

10   **Cited references**

- 11   Sato, T., and T. Hirasawa (1973). Body wave spectra from propagating shear cracks, J. Phys.  
12   Earth 21, 415–431.
- 13   Uchida, Naoki, and Toru Matsuzawa. "Pre-and postseismic slow slip surrounding the 2011  
14   Tohoku-oki earthquake rupture." *Earth and Planetary Science Letters* 374 (2013): 81-91.

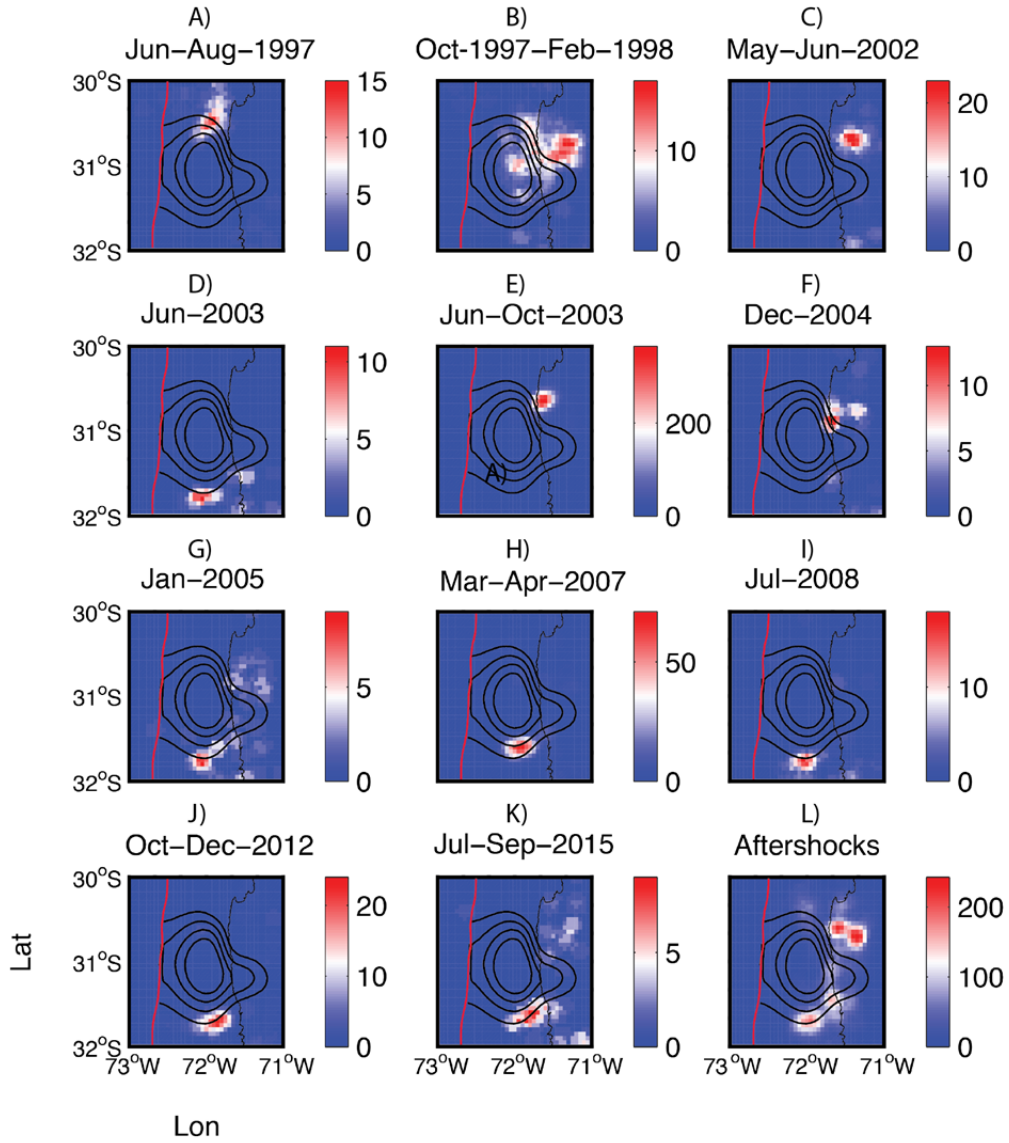

**Figure DR1:** Map view of the swarms. Each map represents the cumulative number of events in the period reported in the top of each figure, using a 0.05deg grid. The color is proportional to the event number. The bottom right map shows the distribution of the aftershocks.

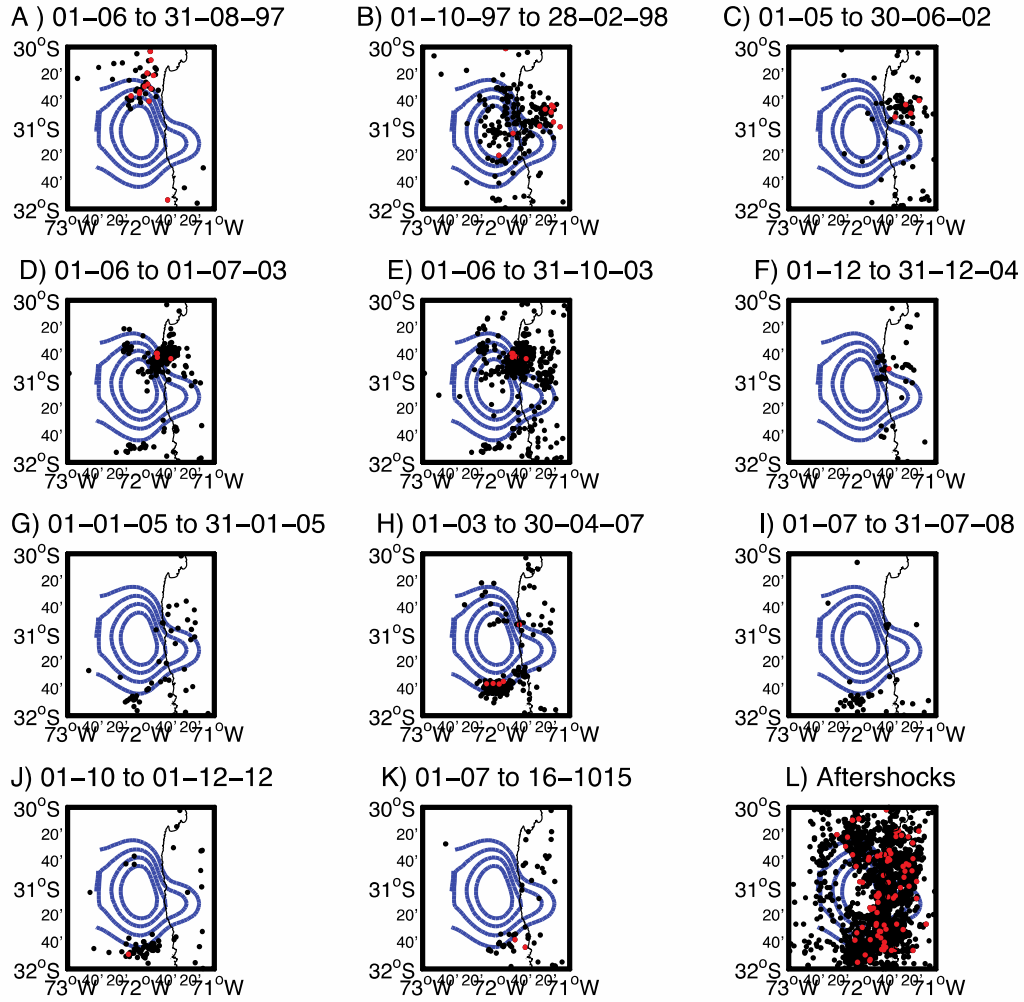

**Fig DR2:** Maps of the various swarms and aftershocks. Event with  $M > 5.5$  are in red, the rest are in black. The dates of the swarms are reported on top of each figure. The right bottom plot is for the aftershocks.

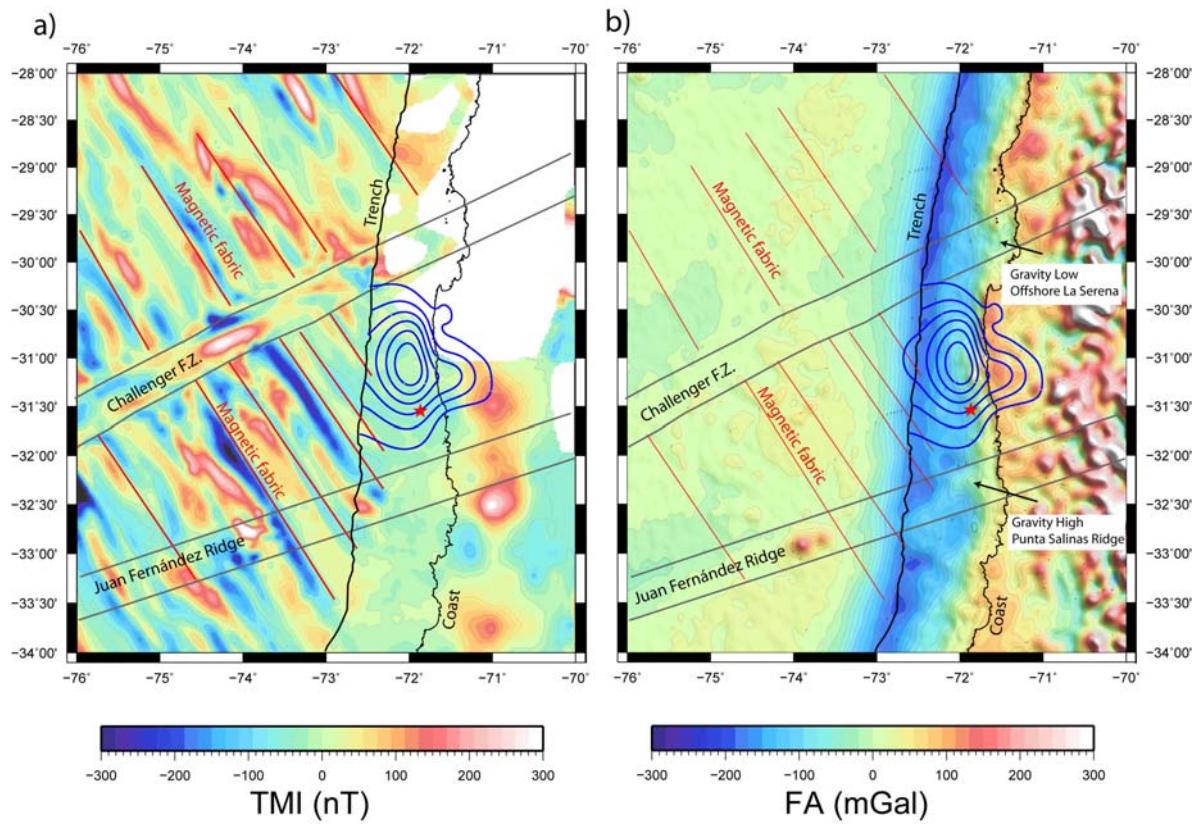

**Figure DR3:** Magnetic (a) and free gravity anomaly (b) maps.

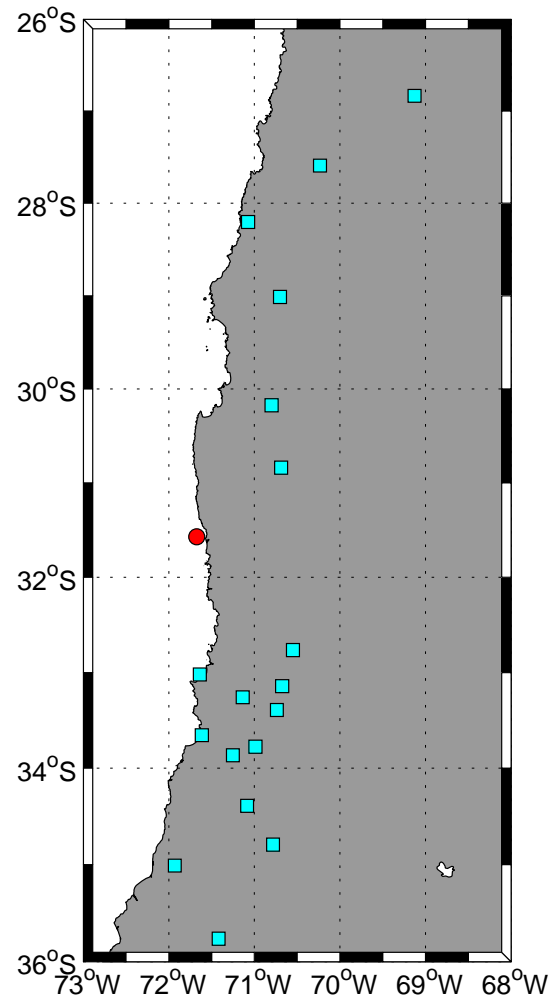

**Fig DR4:** Map of the stations (cyan square) used to study the repeating events. The red dot is the epicenter of the Illapel earthquake.

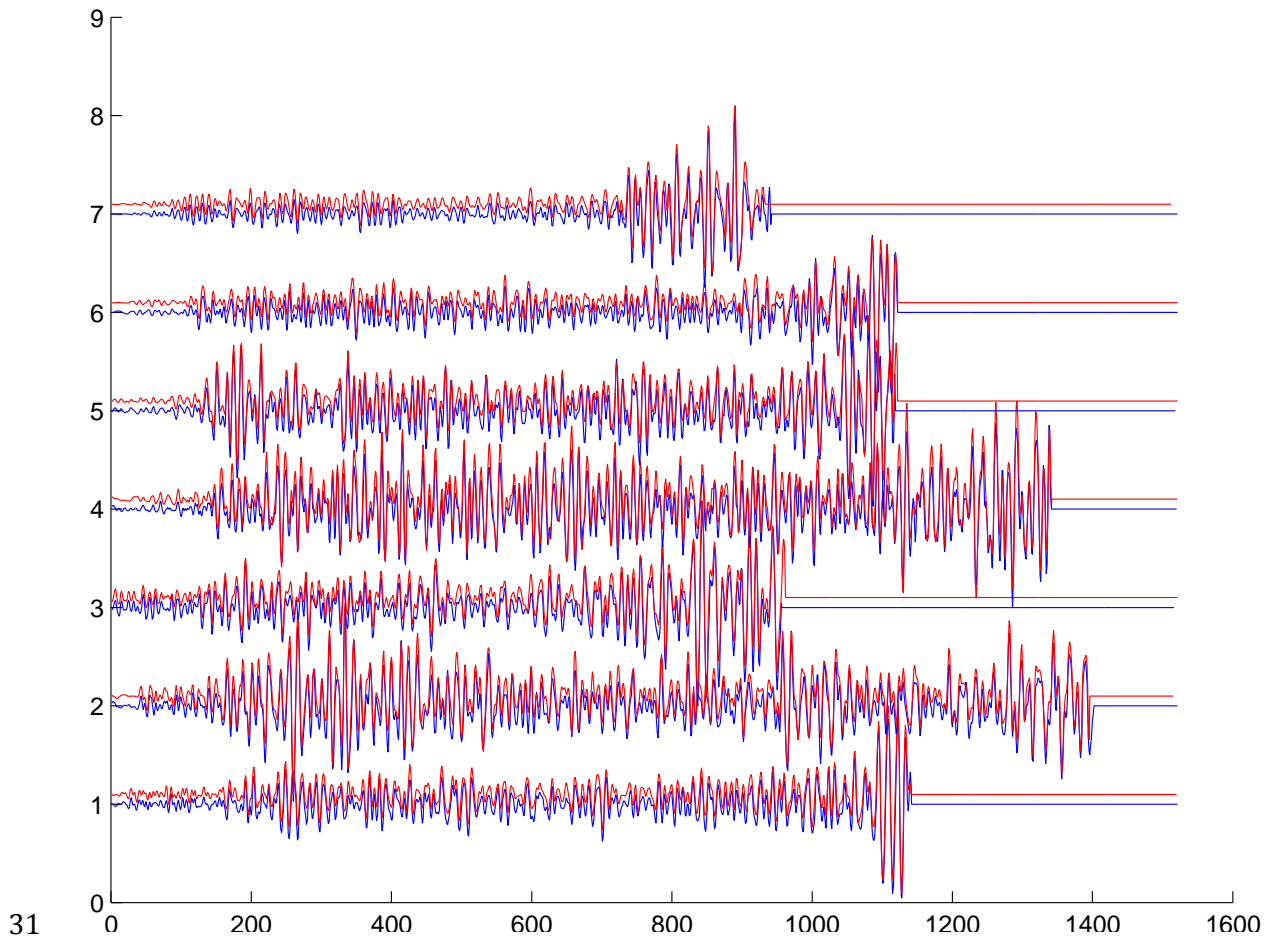

**Fig DR5:** Example of positive detection for a repeating earthquake. In red are the waveforms for the Mw4.4 event at UTC 2016-02-03T17:20:55, while the blue traces are for the Mw 4.2 at UTC 2015-09-27T16:44:30. The correlation coefficient for each couple is larger than 0.95.
